# Supplementary material
Source: Springer Nature journal article supplement (https://www.springermedizin.de/resource/supplementary/12984_2005_44_MOESM11_ESM.pdf/9605190)

Time - Course 1

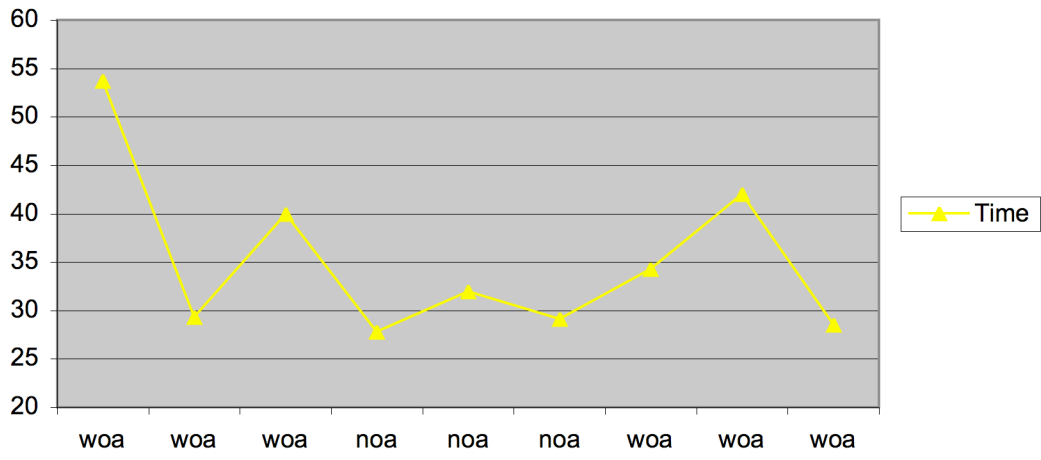

Time - Course 2

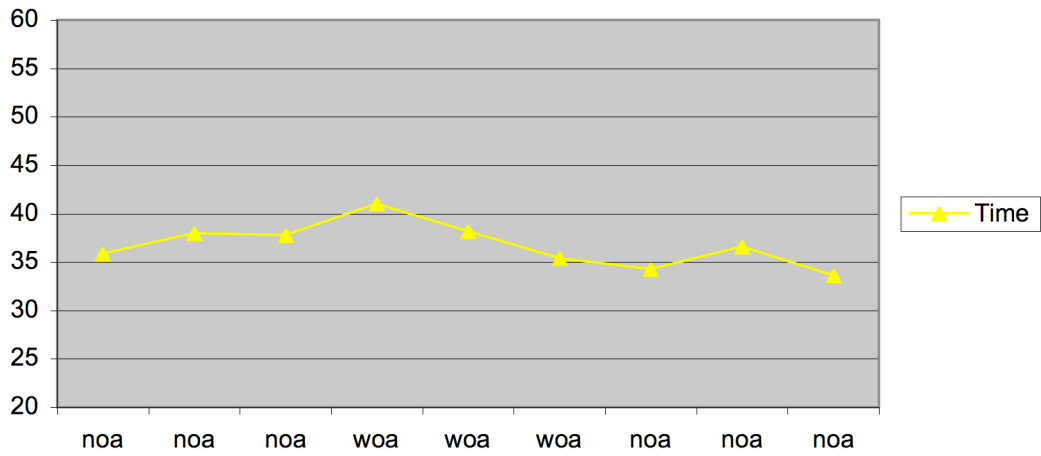

Supplement: MOESM11 [file 9605190]
